# Supplementary material for: All-carbon electrode-based fiber-shaped dye-sensitized solar cells
Source: Royal Society of Chemistry journal article supplement (doi:10.1039/c1cp22613d), 2011-09-19
Supplement: c1cp22613d.pdf [file c1cp22613d.pdf]

† Electronic Supplementary Information (ESI) available: [details of any supplementary information available should be included here]. See DOI: 10.1039/b000000x/

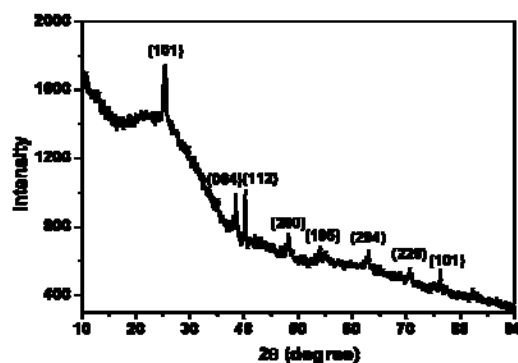

**Fig.S1** XRD characteristic of the annealed  $\text{TiO}_2$  film after calcination in a muffle furnace at  $400^\circ\text{C}$  for 40 min. The XRD spectrum shows an anatase structure (the peak at the  $25.3^\circ$  scattering angle can be indexed to the (101) plane of the anatase  $\text{TiO}_2$ ).

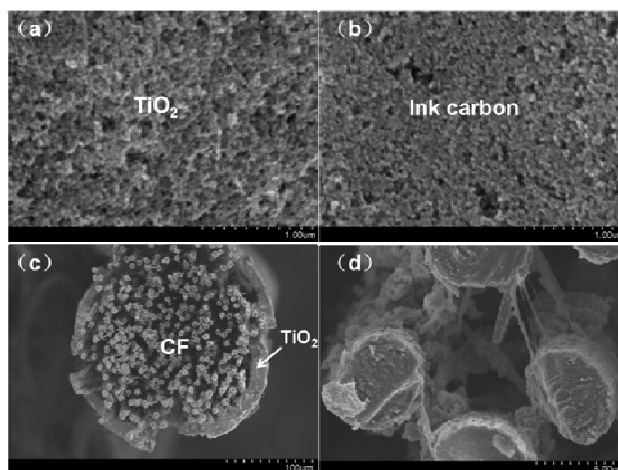

**Fig.S2** (a) The morphology of the  $\text{TiO}_2$  layer shows a porous and interconnected nanoparticle structure. (b) Morphology of the ink carbon layer coating on the surface of CE under higher resolution. (c) A complete cross-section view of the CF/ $\text{TiO}_2$  photoanode. (d) SEM image of carbon fiber monofilaments connected by  $\text{TiO}_2$  clusters in the core of the CF/ $\text{TiO}_2$  photoanode.

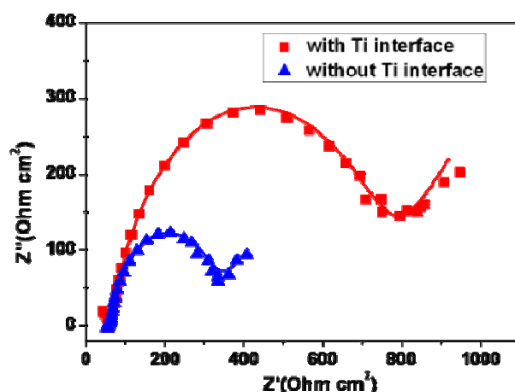

**Fig.S3** EIS curves of fiber-shaped DSSCs based on the CF/TiO<sub>2</sub> photoanode with (D<sub>CF/Ti/TiO<sub>2</sub></sub>) or without (D<sub>CF/TiO<sub>2</sub></sub>) Ti interface layer. EIS were measured using a Solartron 1250 frequency analyzer under dark conditions and 0.3 V forward bias. The perturbation voltage was 10 mV and the frequency range was from 65.5 kHz to 50 mHz. The recombination resistance (R<sub>re</sub>) at the working electrode /electrolyte interface can characterize the degree of recombination, corresponding to the diameter of the second semicircle in the plot. Higher R<sub>re</sub> value means it is more difficult for the electrons in the TiO<sub>2</sub> film to recombine with oxidative species in the electrolyte. The R<sub>re</sub> for D<sub>CF/Ti/TiO<sub>2</sub></sub> and D<sub>CF/TiO<sub>2</sub></sub> are 655 and 248.6 Ω cm<sup>2</sup>, respectively.

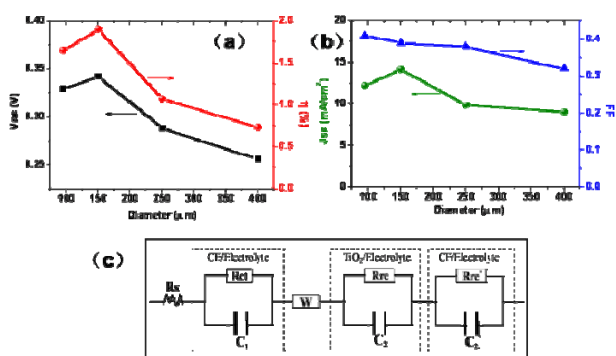

**Fig.S4** (a) Change in the power conversion efficiency ( $\eta$ ) and open-circuit voltage ( $V_{oc}$ ) and (b) fill factor (FF) and short-circuit current density ( $J_{sc}$ ) as the photoanode diameter increases from 95 to 400  $\mu\text{m}$ . (c) Equivalent circuit of the all-carbon electrode-based fiber-shaped DSSCs based on the CF/TiO<sub>2</sub> photoanode with different diameters. From left to right— $R_s$ : serial resistance;  $R_{ct}$ : charge transfer resistance of the CE/electrolyte interface;  $C_1$ : capacitance of the counter electrode;  $R_{re}$ : recombination resistance of the TiO<sub>2</sub>/electrolyte interface;  $C_2$ : capacitance of the TiO<sub>2</sub> surface;  $R_{re}'$ : recombination resistance of the carbon fiber/electrolyte interface in photoanode;  $C_2'$ : capacitance of the CF surface; and  $W$ : diffusion resistance of the electrolyte.
